# Supplementary material for: Chemosensitivity of Patient-Derived Cancer Stem Cells Identifies Colorectal Cancer Patients with Potential Benefit from FGFR Inhibitor Therapy
Source: PubMed Central journal article supplement (PMC7465102; doi:10.3390/cancers12082010), 2020-07-22

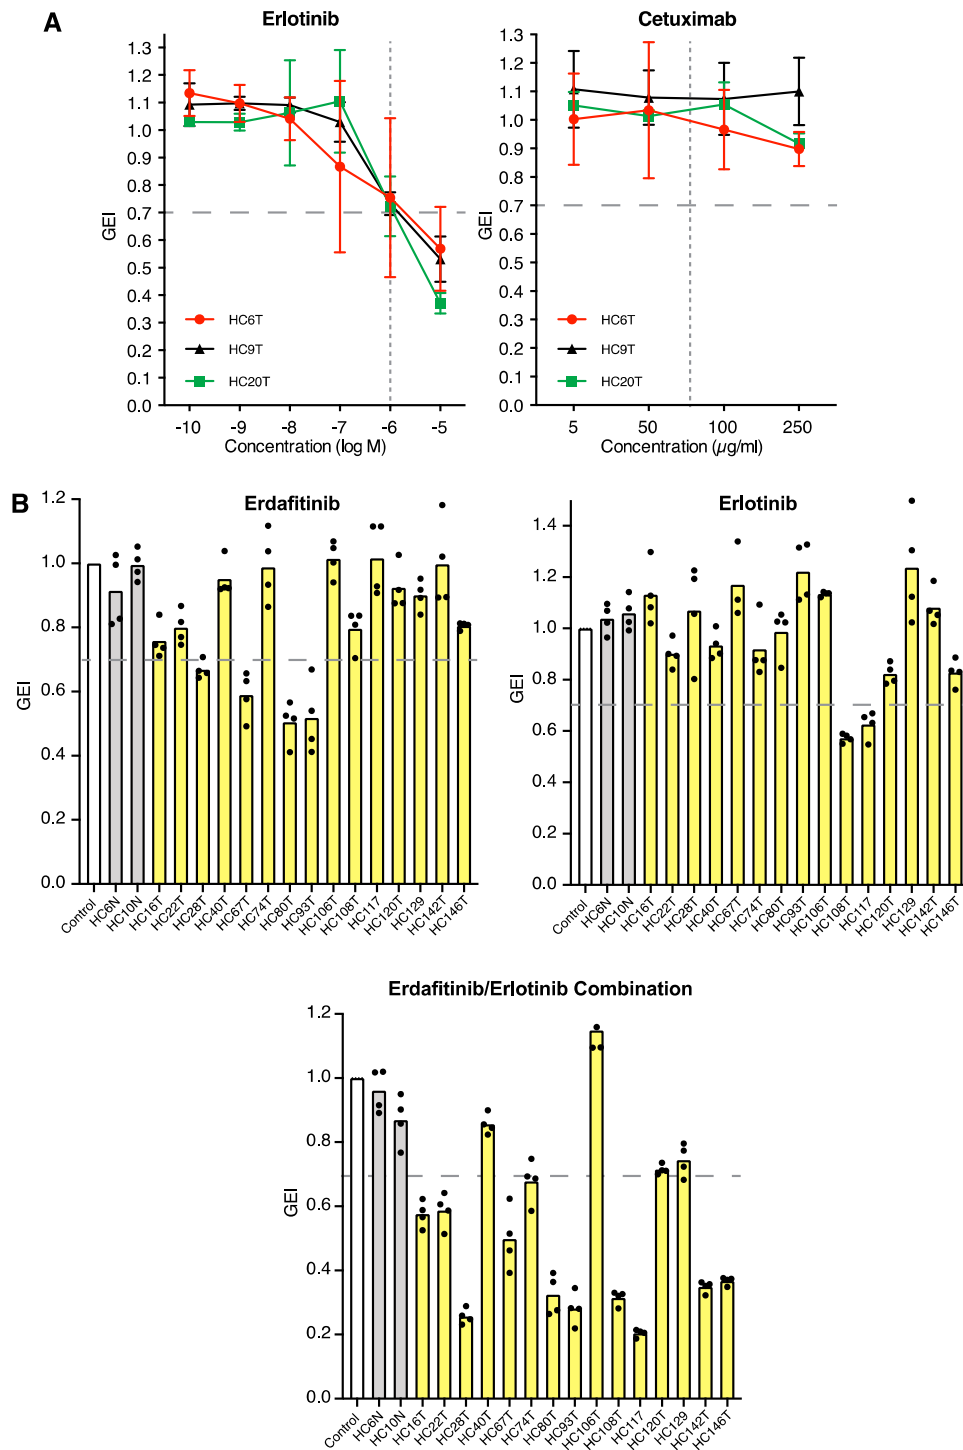

**Figure S1.** Effects of erlotinib (A. left) or cetuximab (A. right) on the growth of three colon cancer spheroid lines, HC6T, HC9T, and HC20T. Dose-dependent growth inhibition was observed by erlotinib but not by cetuximab on all three spheroid lines in vitro likely because of its poor permeability to the culture medium that contained Matrigel. GEI ~0.7, efficacy threshold, dashed lines; clinical doses,  $10^{-6}$  M in erlotinib and ~80  $\mu\text{g}/\text{mL}$  in cetuximab, dotted lines. Effects of erdafitinib (0.1  $\mu\text{M}$ ), erlotinib (1  $\mu\text{M}$ ), or erdafitinib (0.1  $\mu\text{M}$ )/erlotinib (1  $\mu\text{M}$ ) combination on the in vitro growth of 15 RAS/RAF-wild type colorectal cancer TIC spheroid lines and two normal colorectal epithelial stem cell spheroid lines (HC6N, HC10N) (B). The mean values of four replicates are shown as bars with raw data points as dots. The cut-off value of GEI that classifies spheroids as “responsive” or “non-responsive” was assigned at 0.7 (broken line).

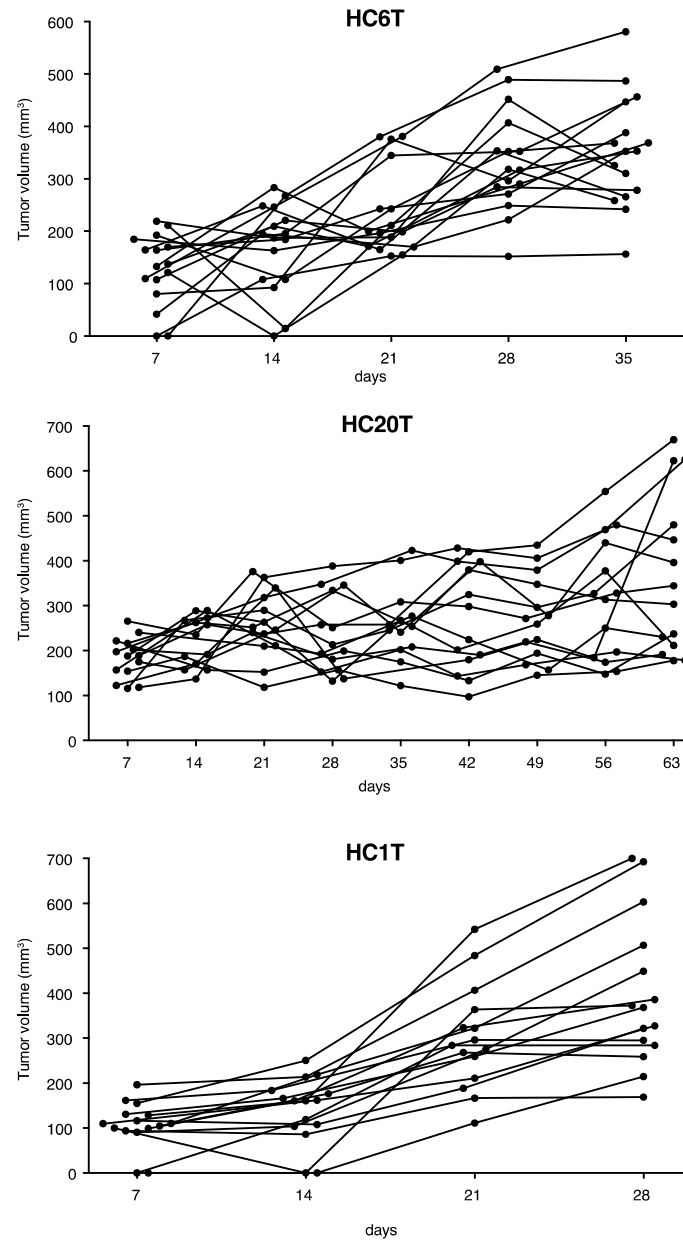

**Figure S2.** Growth of PDSX tumors derived from colorectal cancer TIC spheroid lines (top, HC6T; middle, HC20T; and bottom, HC1T) before drug treatments. Mice with xenografts of the following characteristics were excluded from the dosing tests; too small (<100 mm<sup>3</sup>), spontaneously shrinking, remaining unchanged in size for more than two weeks, or deeply implanted and difficult to be measured.

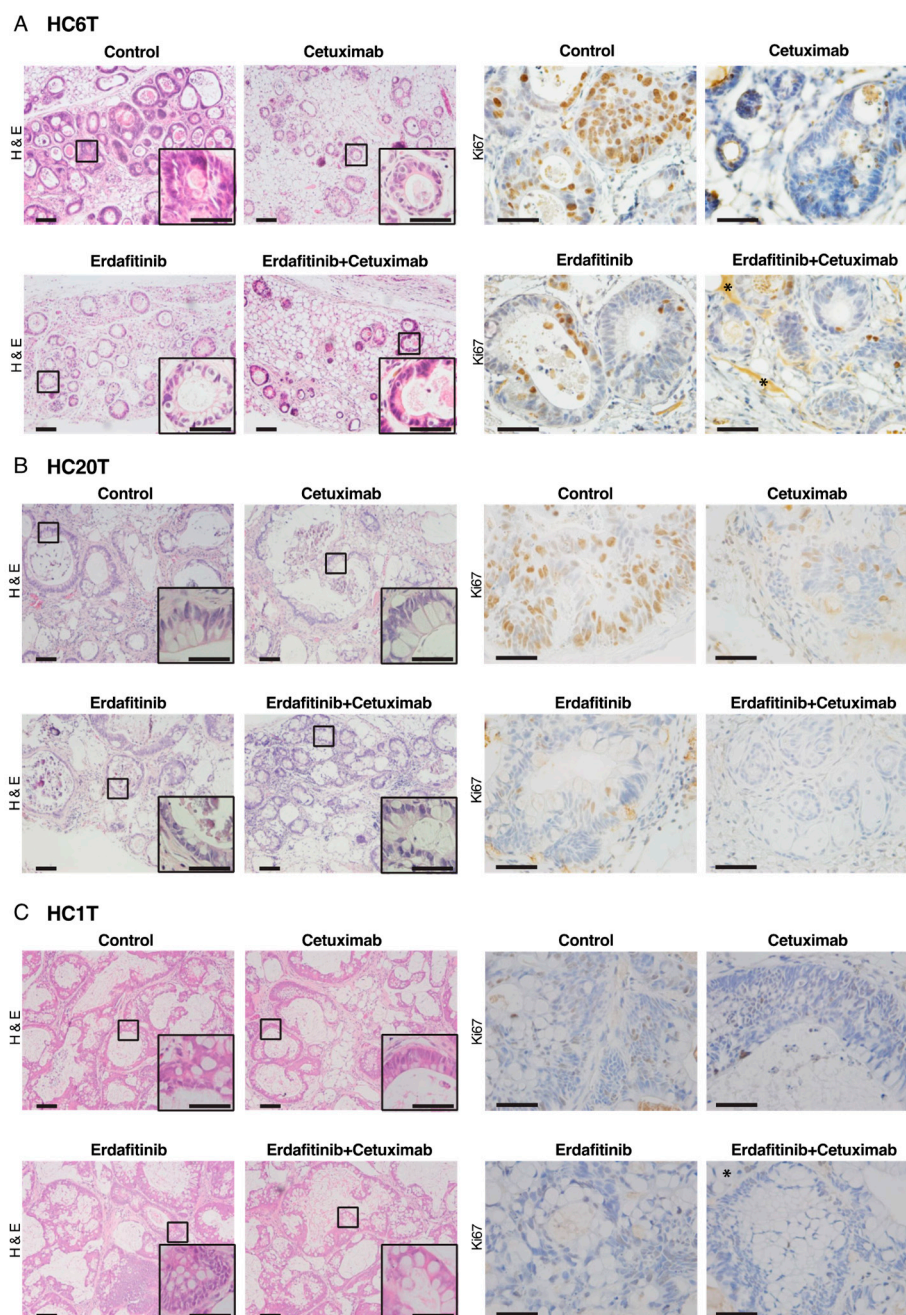

**Figure S3.** Histological specimens of xenograft tumors derived from HC6T (A), HC20T (B), and HC1T (C) spheroid lines on day 21 stained with H&E (left two columns) or immunostained for a proliferation marker, Ki67 (right two columns). Magnification bars, 100  $\mu$ m or 50  $\mu$ m (insets).

|         | FGF1  | FGF2 | FGF3  | FGF4  | FGF5 | FGF6 | FGF7 | FGF8  | FGF9  | FGF10 | FGF11 | FGF12 | FGF13 | FGF14 | FGF16 | FGF17 | FGF18 | FGF19  | FGF20 | FGF21 | FGF22 | FGF23 | Erda | Erlo | Erda/Erlo |
|---------|-------|------|-------|-------|------|------|------|-------|-------|-------|-------|-------|-------|-------|-------|-------|-------|--------|-------|-------|-------|-------|------|------|-----------|
| HC6N    | 0.00  | 0.90 | 0.00  | 0.00  | 0.00 | 0.00 | 0.00 | 0.19  | 0.00  | 0.00  | 0.95  | 0.00  | 0.03  | 0.00  | 0.00  | 0.22  | 0.00  | 0.29   | 0.00  | 3.78  | 0.00  | 0.03  |      |      |           |
| HC9N    | 0.00  | 3.32 | 0.00  | 0.00  | 0.00 | 0.00 | 0.00 | 0.00  | 0.00  | 0.00  | 9.35  | 0.00  | 0.00  | 0.00  | 0.00  | 0.00  | 0.22  | 0.82   | 0.00  | 0.00  | 0.00  | 0.00  |      |      |           |
| HC20N   | 0.00  | 1.31 | 0.00  | 0.00  | 0.00 | 0.00 | 0.00 | 0.00  | 0.00  | 0.00  | 4.02  | 0.00  | 0.00  | 0.00  | 0.00  | 0.00  | 0.04  | 0.11   | 0.00  | 0.00  | 0.18  | 0.00  |      |      |           |
| HC6T    | 0.00  | 0.02 | 10.12 | 0.36  | 0.00 | 0.00 | 0.00 | 0.00  | 0.39  | 0.00  | 1.80  | 0.00  | 0.25  | 0.00  | 0.00  | 0.37  | 6.87  | 38.30  | 40.06 | 0.00  | 0.23  | 0.05  | R    | NR   | R         |
| HC9T    | 0.03  | 0.00 | 1.09  | 0.00  | 0.00 | 0.00 | 0.00 | 0.00  | 0.09  | 0.00  | 1.41  | 0.06  | 0.04  | 0.00  | 0.00  | 0.19  | 8.44  | 0.67   | 4.60  | 0.00  | 0.81  | 0.00  | R    | NR   | R         |
| HC20T   | 0.05  | 0.00 | 0.25  | 0.00  | 0.00 | 0.00 | 0.00 | 0.23  | 0.20  | 0.00  | 1.88  | 0.00  | 0.04  | 0.00  | 0.00  | 0.00  | 0.39  | 2.34   | 23.96 | 0.00  | 0.80  | 0.13  | R    | NR   | R         |
| HC28T   | 0.05  | 3.48 | 51.10 | 0.00  | 0.00 | 0.00 | 0.00 | 0.89  | 6.64  | 0.00  | 0.70  | 0.00  | 0.14  | 0.00  | 0.00  | 0.89  | 6.64  | 52.02  | 7.39  | 0.14  | 0.57  | 0.00  | R    | NR   | R         |
| HC67T   | 0.06  | 0.00 | 0.20  | 0.00  | 0.00 | 0.00 | 0.04 | 0.00  | 2.55  | 0.00  | 1.90  | 0.00  | 0.18  | 0.00  | 0.00  | 0.00  | 3.35  | 1.04   | 29.25 | 0.36  | 0.00  | 0.16  | R    | NR   | R         |
| HC80T   | 0.02  | 0.00 | 9.23  | 0.00  | 0.00 | 0.00 | 0.00 | 1.58  | 0.49  | 0.00  | 2.27  | 0.02  | 0.03  | 0.00  | 0.00  | 0.25  | 2.01  | 176.46 | 15.79 | 0.13  | 0.36  | 0.47  | R    | NR   | R         |
| HC93T   | 0.06  | 0.00 | 1.12  | 1.42  | 0.00 | 0.00 | 0.00 | 0.52  | 10.19 | 0.00  | 0.51  | 0.00  | 0.13  | 0.00  | 0.00  | 0.31  | 5.24  | 17.01  | 5.54  | 0.00  | 1.79  | 0.05  | R    | NR   | R         |
| HC7T    | 0.06  | 0.00 | 0.21  | 0.00  | 0.00 | 0.00 | 0.00 | 0.00  | 0.43  | 0.00  | 1.17  | 0.02  | 0.22  | 0.00  | 0.00  | 0.08  | 9.25  | 2.78   | 35.70 | 0.12  | 0.00  | 0.40  | NR   | R    | R         |
| HC10T   | 0.00  | 0.30 | 0.00  | 0.00  | 0.00 | 0.00 | 0.00 | 0.13  | 0.00  | 0.00  | 0.71  | 0.00  | 0.00  | 0.00  | 0.00  | 0.00  | 0.36  | 0.74   | 0.00  | 0.65  | 0.00  | 0.00  | NR   | R    | R         |
| HC73T   | 0.00  | 0.00 | 0.13  | 0.00  | 0.00 | 0.00 | 0.00 | 0.09  | 0.00  | 0.00  | 21.13 | 0.02  | 0.39  | 0.00  | 0.00  | 0.30  | 0.42  | 0.87   | 0.10  | 0.23  | 0.00  | 0.00  | NR   | R    | R         |
| HC108T  | 0.00  | 0.00 | 1.97  | 0.00  | 0.00 | 0.00 | 0.00 | 0.00  | 1.51  | 0.00  | 1.90  | 0.02  | 0.08  | 0.00  | 0.00  | 0.00  | 10.09 | 11.31  | 34.46 | 1.57  | 0.00  | 1.01  | NR   | R    | R         |
| HC117T  | 0.00  | 1.50 | 0.10  | 0.00  | 0.00 | 0.00 | 0.00 | 0.27  | 0.07  | 0.00  | 0.54  | 0.05  | 0.00  | 0.05  | 0.00  | 0.11  | 1.19  | 0.31   | 0.15  | 0.00  | 0.23  | 0.00  | NR   | R    | R         |
| HC1T    | 0.00  | 0.16 | 0.00  | 0.00  | 0.00 | 0.18 | 0.00 | 0.00  | 0.18  | 0.00  | 2.35  | 0.00  | 0.00  | 0.00  | 0.00  | 0.10  | 0.14  | 0.00   | 0.13  | 0.00  | 0.21  | 0.04  | NR   | NR   | R         |
| HC8T    | 0.00  | 2.24 | 0.00  | 0.00  | 0.00 | 0.00 | 0.00 | 0.88  | 0.25  | 0.00  | 1.01  | 0.09  | 0.04  | 0.05  | 0.00  | 0.10  | 2.30  | 3.41   | 35.60 | 0.00  | 1.09  | 0.09  | NR   | NR   | R         |
| HC11T   | 0.00  | 0.04 | 0.09  | 0.00  | 0.00 | 0.00 | 0.00 | 0.12  | 0.00  | 0.00  | 2.07  | 0.02  | 0.16  | 0.00  | 0.00  | 0.10  | 0.21  | 0.51   | 0.00  | 0.00  | 0.21  | 0.00  | NR   | NR   | R         |
| HC16T   | 0.00  | 0.09 | 0.56  | 0.00  | 0.00 | 0.00 | 0.00 | 0.00  | 0.29  | 0.00  | 0.89  | 0.00  | 0.21  | 0.00  | 0.00  | 0.00  | 1.39  | 2.10   | 0.57  | 0.00  | 0.11  | 0.19  | NR   | NR   | R         |
| HC21T   | 0.00  | 0.29 | 0.09  | 0.00  | 0.00 | 0.00 | 0.00 | 0.00  | 0.32  | 0.00  | 1.08  | 0.02  | 0.12  | 0.00  | 0.00  | 0.00  | 2.69  | 5.87   | 10.64 | 0.00  | 0.00  | 0.00  | NR   | NR   | R         |
| HC22T   | 0.06  | 0.02 | 27.24 | 7.73  | 0.03 | 0.00 | 0.00 | 33.85 | 38.32 | 0.00  | 1.73  | 0.55  | 0.16  | 0.00  | 0.00  | 1.05  | 10.76 | 21.14  | 82.64 | 0.00  | 1.67  | 0.00  | NR   | NR   | R         |
| HC74T   | 0.00  | 0.04 | 1.12  | 0.00  | 0.00 | 0.14 | 0.00 | 0.09  | 4.09  | 0.00  | 0.46  | 0.00  | 0.18  | 0.00  | 0.00  | 0.07  | 1.10  | 1.16   | 0.25  | 0.23  | 0.08  | 0.00  | NR   | NR   | R         |
| HC142T  | 0.11  | 1.00 | 0.06  | 0.00  | 0.09 | 0.00 | 0.50 | 0.08  | 0.18  | 0.00  | 1.46  | 0.01  | 0.49  | 0.09  | 0.00  | 0.13  | 13.32 | 1.14   | 27.79 | 0.15  | 0.21  | 0.22  | NR   | NR   | R         |
| HC146T  | 0.00  | 0.04 | 1.51  | 0.00  | 0.00 | 0.00 | 0.00 | 0.12  | 0.09  | 0.00  | 1.07  | 0.00  | 0.41  | 0.00  | 0.00  | 0.66  | 0.13  | 3.77   | 0.00  | 0.00  | 0.09  | 0.09  | NR   | NR   | R         |
| HC40T   | 0.00  | 0.04 | 7.28  | 0.00  | 0.00 | 0.00 | 0.00 | 0.00  | 5.21  | 0.00  | 0.95  | 0.00  | 0.28  | 0.00  | 0.00  | 0.09  | 7.07  | 6.84   | 11.08 | 0.00  | 0.56  | 0.00  | NR   | NR   | NR        |
| HC106T  | 0.00  | 0.35 | 1.72  | 0.00  | 0.00 | 0.00 | 0.00 | 0.27  | 5.58  | 0.00  | 1.82  | 0.02  | 0.00  | 0.24  | 0.00  | 0.21  | 7.09  | 49.62  | 2.91  | 0.00  | 0.00  | 0.00  | NR   | NR   | NR        |
| HC120T  | 0.00  | 0.00 | 0.27  | 0.00  | 0.00 | 0.00 | 0.00 | 0.12  | 0.18  | 0.00  | 0.57  | 0.02  | 0.00  | 0.00  | 0.00  | 0.00  | 5.74  | 3.45   | 0.20  | 0.00  | 0.43  | 0.00  | NR   | NR   | NR        |
| HC129T  | 0.06  | 0.40 | 0.85  | 0.09  | 0.00 | 0.00 | 0.00 | 0.00  | 0.21  | 0.00  | 3.49  | 0.05  | 0.23  | 0.00  | 0.00  | 0.12  | 2.41  | 2.61   | 2.24  | 0.13  | 0.18  | 0.53  | NR   | NR   | NR        |
| r value | -0.16 | 0.19 | -0.20 | -0.05 | 0.23 | 0.15 | 0.22 | 0.01  | 0.00  |       | 0.05  | 0.08  | 0.12  | 0.40  |       | -0.17 | 0.02  | -0.35  | -0.18 | 0.04  | -0.29 | -0.03 |      |      |           |

**Figure S4.** The levels of mRNA for all 22 FGF ligands in the 25 spheroid lines. The association (*r*-value) between FGFR inhibitor sensitivity (GEI) and mRNA levels (TPM) is shown at the bottom column. The background color shows the level of expression ranging from blue (for the highest) to red (for the lowest). There was a correlation of the sensitivity to erdafitinib with the mRNA level of *FGF19* (*r* = -0.35), but not with those of other *FGF* ligands. Abbreviations R and NR stand for “responsive” and “non-responsive”, respectively, to erdafitinib, erlotinib, and the erdafitinib/erlotinib combination. Note that no human *FGF15* is assigned whereas *Fgf15* is the mouse ortholog of human *FGF19*.

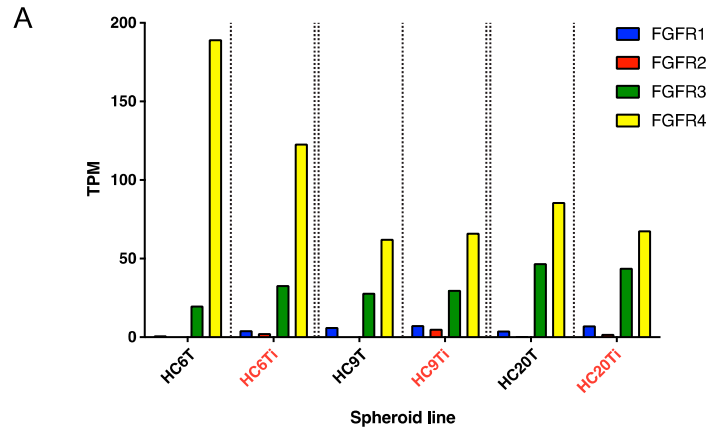

B

|        | FGF1 | FGF2 | FGF3  | FGF4 | FGF5 | FGF6 | FGF7 | FGF8 | FGF9 | FGF10 | FGF11 | FGF12 | FGF13 | FGF14 | FGF16 | FGF17 | FGF18 | FGF19 | FGF20 | FGF21 | FGF22 | FGF23 |
|--------|------|------|-------|------|------|------|------|------|------|-------|-------|-------|-------|-------|-------|-------|-------|-------|-------|-------|-------|-------|
| HC6T   | 0.00 | 0.02 | 10.12 | 0.36 | 0.00 | 0.00 | 0.00 | 0.00 | 0.39 | 0.00  | 1.80  | 0.00  | 0.25  | 0.00  | 0.00  | 0.37  | 6.87  | 38.30 | 40.06 | 0.00  | 0.23  | 0.05  |
| HC6Ti  | 0.27 | 0.47 | 1.32  | 0.00 | 0.00 | 0.00 | 1.54 | 0.00 | 0.09 | 0.22  | 2.05  | 0.03  | 2.30  | 0.04  | 0.00  | 0.29  | 3.08  | 0.67  | 3.61  | 0.00  | 0.00  | 0.00  |
| HC9T   | 0.03 | 0.00 | 1.09  | 0.00 | 0.00 | 0.00 | 0.00 | 0.00 | 0.09 | 0.00  | 1.41  | 0.06  | 0.04  | 0.00  | 0.00  | 0.19  | 8.44  | 0.67  | 4.60  | 0.00  | 0.81  | 0.00  |
| HC9Ti  | 0.42 | 2.34 | 0.32  | 0.00 | 0.00 | 0.00 | 5.02 | 0.00 | 0.77 | 0.52  | 1.31  | 0.08  | 1.16  | 0.05  | 0.00  | 0.00  | 3.65  | 0.76  | 0.80  | 0.00  | 0.00  | 1.19  |
| HC20T  | 0.05 | 0.00 | 0.25  | 0.00 | 0.00 | 0.00 | 0.00 | 0.23 | 0.20 | 0.00  | 1.88  | 0.00  | 0.04  | 0.00  | 0.00  | 0.00  | 0.39  | 2.34  | 23.96 | 0.00  | 0.80  | 0.13  |
| HC20Ti | 0.09 | 0.15 | 0.09  | 0.00 | 0.00 | 0.00 | 1.02 | 0.00 | 0.42 | 0.44  | 0.58  | 0.00  | 0.06  | 0.00  | 0.00  | 0.00  | 0.38  | 0.00  | 0.00  | 0.00  | 0.00  | 0.00  |

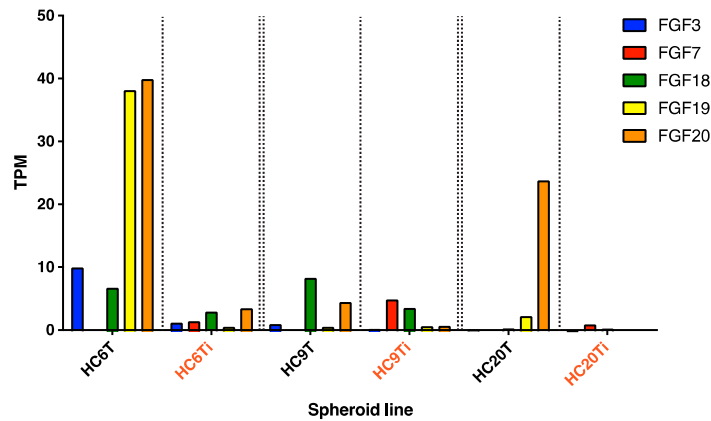

**Figure S5.** The mRNA levels for *FGF* receptors (A) and the ligands (B) in frozen whole tumor tissues for HC6T, HC9T, and HC20T determined by RNA-seq analysis (in transcripts per million; TPM). Note that the *FGFR* mRNA levels were similar between the tumor tissues (HC6Ti, HC9Ti, and HC20Ti) and corresponding spheroid lines (HC6T, HC9T, and HC20T) (A), whereas the ligand mRNA levels were relatively low in all the three tested whole tissues to the corresponding spheroid lines (B).

A

FG FR 4

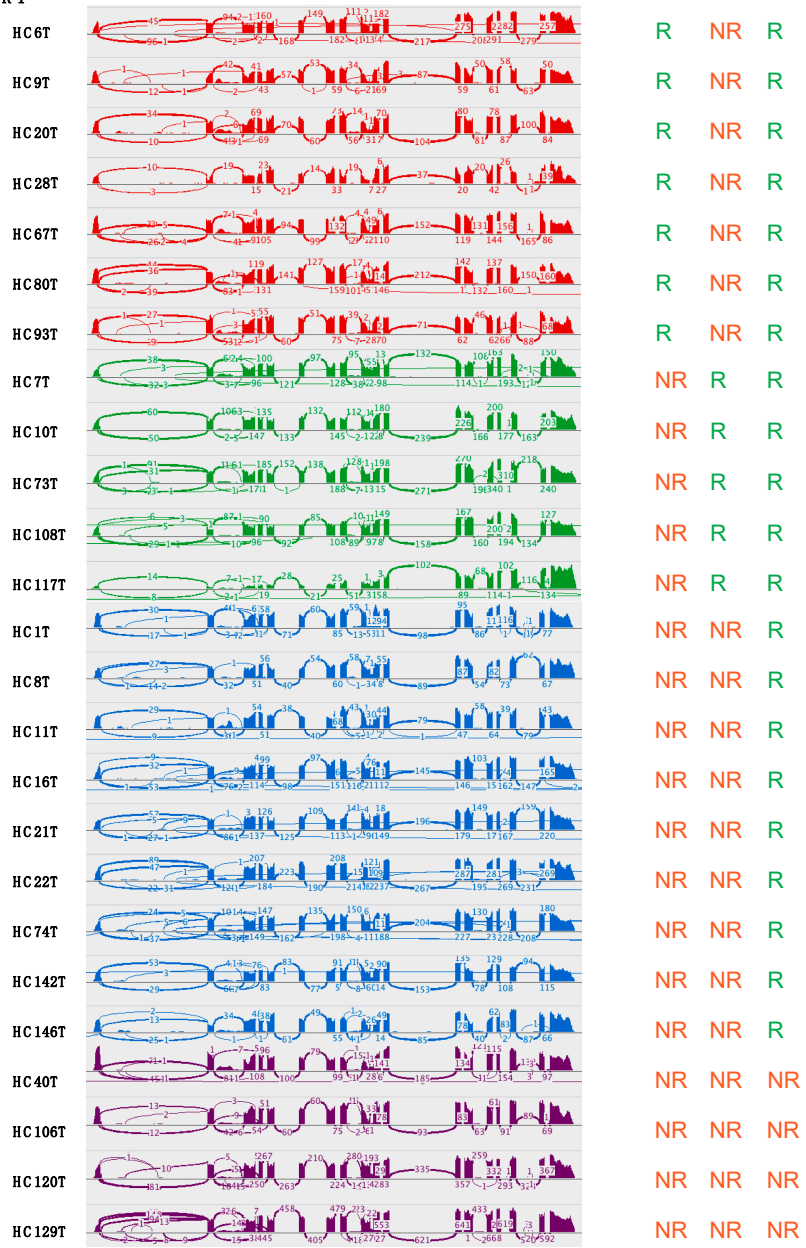

Figure 6. Cont.

**B**

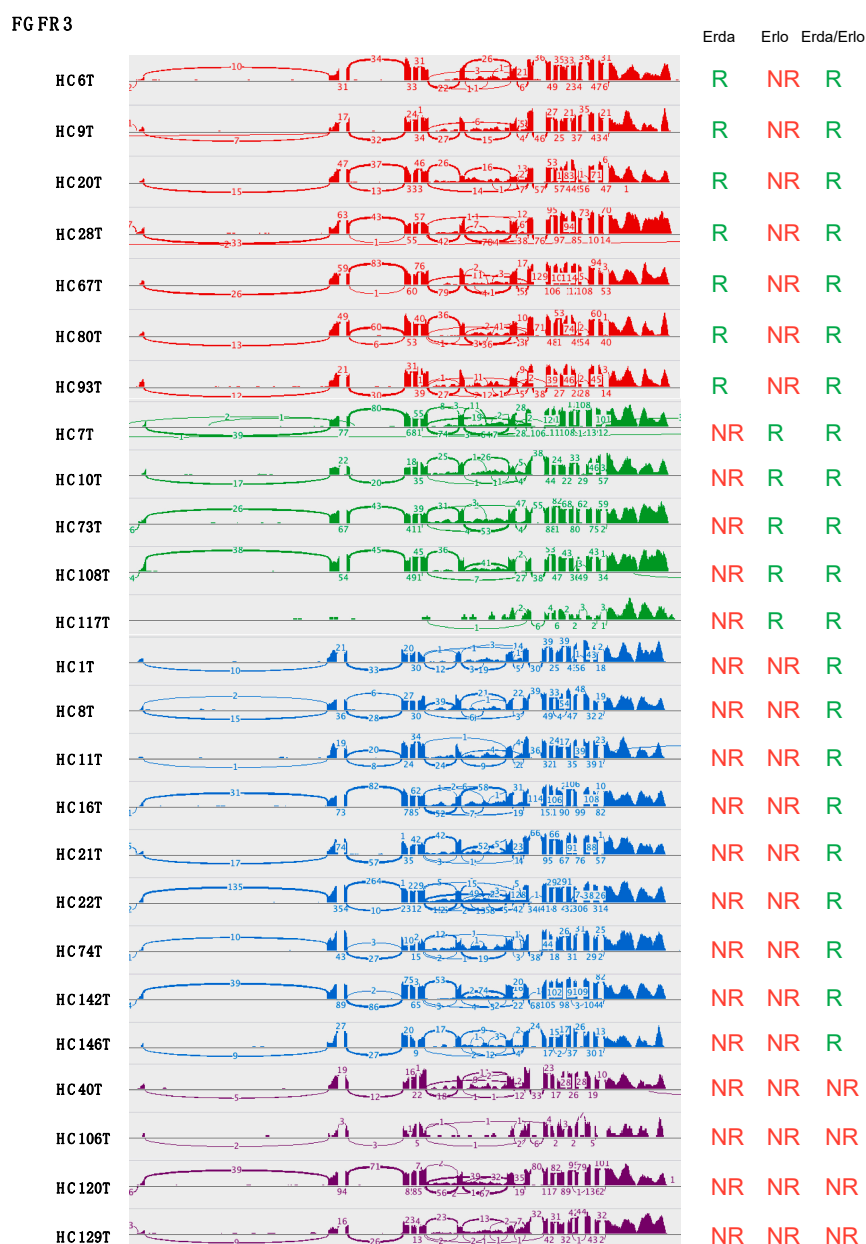

**Figure S6.** (A) Sashimi plots across RNA-seq samples of *FGFR4* mRNA in all 25 colorectal cancer TIC-spheroid lines. Read densities across exons are quantified in RPKM (read per kilobase/million) and junction reads are shown as arcs, annotated with read numbers. Abbreviations R and NR stand for “responsive” and “non-responsive”, respectively, to erdafitinib, erlotinib, and the erdafitinib/erlotinib combination. (B) Sashimi plots across RNA-seq samples of *FGFR3* mRNA in all 25 colorectal cancer TIC-spheroid lines. Read densities across exons are quantified in RPKM (read per kilobase/million) and junction reads are shown as arcs, annotated with read numbers. Abbreviations R and NR stand for “responsive” and “non-responsive”, respectively, to erdafitinib, erlotinib, and the erdafitinib/erlotinib combination.

**Table S1.** Mutational status detected by targeted next-generation sequencing of 409 cancer-related genes in each spheroid sample.

| Chrom        | Position  | Ref | Variant | Frequency | Type | Allele Name | Gene ID | AChange.refGene                                    |
|--------------|-----------|-----|---------|-----------|------|-------------|---------|----------------------------------------------------|
| <b>HC1T</b>  |           |     |         |           |      |             |         |                                                    |
| chr2         | 5833842   | C   | T       | 54.4      | SNP  | ---         | SOX11   | NM_003108:exon1:c.989C>T;p.A330V                   |
| chr3         | 178936091 | G   | A       | 47.8      | SNP  | COSM763     | PIK3CA  | NM_006218:exon10:c.1633G>A;p.E545K                 |
| chr5         | 112175513 | G   | T       | 46.3      | SNP  | COSM18822   | APC     | NM_000038:exon16:c.4222G>T;p.E1408X                |
| chr7         | 50367288  | C   | T       | 44.4      | SNP  | ---         | IKZF1   | NM_006060:exon3:c.95C>T;p.P32L                     |
| chr8         | 71037056  | G   | A       | 51.5      | SNP  | ---         | NCOA2   | NM_006540:exon20:c.3961C>T;p.P1321S                |
| chr18        | 48604788  | A   | G       | 100       | SNP  | ---         | SMAD4   | NM_005359:exon12:c.1610A>G;p.D537G                 |
| chr22        | 36689877  | G   | T       | 43.4      | SNP  | ---         | MYH9    | NM_002473:exon29:c.3870C>A;p.S1290R                |
| <b>HC6T</b>  |           |     |         |           |      |             |         |                                                    |
| chr5         | 112174920 | AT  | -       | 53.3      | DEL  | ---         | APC     | NM_000038:exon16:c.3629_3630del;p.H1210fs          |
| chr5         | 112175466 | C   | A       | 34.4      | SNP  | ---         | APC     | NM_000038:exon16:c.4175C>A;p.S1392X                |
| chr9         | 8340383   | G   | T       | 29.5      | SNP  | ---         | PTPRD   | NM_130391:exon27:c.3992C>A;p.T1331N                |
| chr17        | 7577121   | G   | A       | 99.9      | SNP  | COSM10659   | TP53    | NM_000546:exon8:c.817C>T;p.R273C                   |
| chrX         | 41031129  | G   | C       | 20.5      | SNP  | ---         | USP9X   | NM_001039590:exon21:c.3066G>C;p.W1022C             |
| <b>HC7T</b>  |           |     |         |           |      |             |         |                                                    |
| chr2         | 5833373   | G   | A       | 50.4      | SNP  | ---         | SOX11   | NM_003108:exon1:c.520G>A;p.A174T                   |
| chr4         | 88047313  | C   | T       | 100       | SNP  | ---         | AFF1    | NM_005935:exon13:c.2615C>T;p.S872X                 |
| chr6         | 56483001  | G   | A       | 27.6      | SNP  | ---         | DST     | NM_001723:exon23:c.5831C>T;p.A1944V                |
| chr11        | 44129747  | A   | G       | 34.1      | SNP  | ---         | EXT2    | NM_000401:exon2:c.584A>G;p.Q195R                   |
| chr11        | 118375555 | G   | A       | 69        | SNP  | ---         | MLL     | NM_005933:exon27:c.8939G>A;p.G2980E                |
| chr17        | 7577498   | C   | T       | 100       | SNP  | COSM43571   | TP53    | Splicing                                           |
| chr17        | 12032474  | C   | T       | 100       | SNP  | ---         | MAP2K4  | NM_003010:exon9:c.910C>T;p.R304X                   |
| chr17        | 29483091  | T   | -       | 33.5      | DEL  | ---         | NF1     | NM_000267:exon2:c.151delT;p.F51fs                  |
| chr19        | 1615470   | G   | A       | 35.6      | SNP  | ---         | TCF3    | NM_003200:exon18:c.1636C>T;p.R546W                 |
| chrX         | 63411291  | G   | A       | 52.9      | SNP  | ---         | FAM123B | NM_152424:exon2:c.1876C>T;p.R626X                  |
| <b>HC9T</b>  |           |     |         |           |      |             |         |                                                    |
| chr3         | 10191645  | A   | G       | 67.3      | SNP  | ---         | VHL     | NM_000551:exon3:c.638A>G;p.D213G                   |
| chr5         | 112164664 | A   | -       | 100       | DEL  | ---         | APC     | NM_000038:exon14:c.1742delA;p.K581fs               |
| chr17        | 7578247   | -   | A       | 100       | INS  | ---         | TP53    | NM_000546:exon6:c.601dupT;p.L201fs                 |
| chr17        | 7579714   | C   | T       | 100       | SNP  | ---         | TP53    | NM_000546:exon3:c.82G>A;p.E28K                     |
| <b>HC10T</b> |           |     |         |           |      |             |         |                                                    |
| chr3         | 37860464  | T   | C       | 49.3      | SNP  | ---         | ITGA9   | NM_002207:exon28:c.3092T>C;p.V1031A                |
| chr3         | 70014040  | C   | G       | 51        | SNP  | ---         | MITF    | NM_000248:exon9:c.901C>G;p.P301A                   |
| chr3         | 89391088  | G   | A       | 48.5      | SNP  | ---         | EPHA3   | NM_005233:exon5:c.1154G>A;p.R385Q                  |
| chr5         | 112162891 | C   | T       | 49.5      | SNP  | COSM29364   | APC     | NM_000038:exon12:c.1495C>T;p.R499X                 |
| chr5         | 11215639  | C   | T       | 49.2      | SNP  | COSM13127   | APC     | NM_000038:exon16:c.4348C>T;p.R1450X                |
| chr11        | 106558429 | A   | C       | 51.1      | SNP  | ---         | GUCY1A2 | NM_000855:exon8:c.2045T>G;p.L682R                  |
| chr12        | 49420286  | C   | A       | 38.8      | SNP  | ---         | MLL2    | NM_003482:exon48:c.15463G>T;p.V5155F               |
| chr16        | 68867358  | T   | C       | 48.6      | SNP  | ---         | CDH1    | NM_004360:exon16:c.2605T>C;p.F869L                 |
| chr17        | 7577138   | C   | T       | 50.9      | SNP  | COSM43923   | TP53    | NM_000546:exon8:c.800G>A;p.R267Q                   |
| <b>HC11T</b> |           |     |         |           |      |             |         |                                                    |
| chr1         | 115053393 | -   | GCTGGA  | 45.5      | INS  | ---         | TRIM33  | NM_015906:exon1:c.305_306insTCCAGC;p.A102delinsAPA |
| chr5         | 112175897 | G   | T       | 98.4      | SNP  | COSM19056   | APC     | NM_000038:exon16:c.4606G>T;p.E1536X                |
| chr7         | 106509426 | C   | G       | 70.4      | SNP  | ---         | PIK3CG  | NM_002649:exon2:c.1420C>G;p.L474V                  |
| chr10        | 96522463  | A   | G       | 49.9      | SNP  | ---         | CYP2C19 | NM_000769:exon1:c.1A>G;p.M1V                       |
| chr11        | 95826309  | C   | A       | 52.9      | SNP  | ---         | MAML2   | NM_032427:exon2:c.886G>T;p.D296Y                   |
| chr12        | 4398151   | G   | A       | 45.3      | SNP  | ---         | CCND2   | NM_001759:exon4:c.715G>A;p.D239N                   |
| chr13        | 41240075  | G   | A       | 35.7      | SNP  | ---         | FOXO1   | NM_002015:exon1:c.275C>T;p.A92V                    |
| chr17        | 5462049   | G   | A       | 100       | SNP  | ---         | NLRP1   | NM_014922:exon4:c.1967C>T;p.T656M                  |
| chr17        | 7578398   | G   | -       | 100       | DEL  | COSM44659   | TP53    | NM_000546:exon5:c.532delC;p.H178fs                 |
| chr18        | 45368213  | G   | T       | 100       | SNP  | ---         | SMAD2   | NM_005901:exon11:c.1389C>A;p.C463X                 |
| chrX         | 48650332  | C   | T       | 99.1      | SNP  | ---         | GATA1   | NM_002049:exon3:c.302C>T;p.T101M                   |
| <b>HC16T</b> |           |     |         |           |      |             |         |                                                    |
| chr1         | 27088788  | -   | G       | 74.9      | INS  | ---         | ARID1A  | NM_006015:exon7:c.2397dupG;p.Q799fs                |
| chr4         | 153249384 | C   | T       | 20.6      | SNP  | COSM117308  | FBXW7   | NM_018315:exon10:c.1505C>T;p.S502L                 |
| chr4         | 153245446 | G   | A       | 79.2      | SNP  | COSM22979   | FBXW7   | NM_018315:exon8:c.1154G>A;p.R385H                  |
| chr5         | 112128191 | C   | T       | 100       | SNP  | COSM13130   | APC     | NM_000038:exon7:c.694C>T;p.R232X                   |
| chr8         | 145740393 | G   | A       | 79.5      | SNP  | ---         | RECQL4  | NM_004260:exon9:c.1547C>T;p.A516V                  |
| chr12        | 49424728  | C   | T       | 35.5      | SNP  | ---         | MLL2    | NM_003482:exon40:c.13619G>A;p.R4540Q               |
| chr14        | 99640652  | G   | A       | 72.8      | SNP  | ---         | BCL11B  | NM_022898:exon3:c.2308C>T;p.R770C                  |
| chr17        | 7577082   | C   | T       | 98.7      | SNP  | COSM99924   | TP53    | NM_000546:exon8:c.856G>A;p.E286K                   |
| <b>HC20T</b> |           |     |         |           |      |             |         |                                                    |
| chr6         | 51751973  | G   | A       | 50.3      | SNP  | ---         | PKHD1   | NM_138694:exon44:c.7067C>T;p.P2356L                |
| chr8         | 113569067 | G   | C       | 21.8      | SNP  | ---         | CSMD3   | NM_052900:exon24:c.3847C>G;p.L1283V                |
| chr8         | 113569114 | T   | C       | 31.2      | SNP  | ---         | CSMD3   | NM_052900:exon24:c.3800A>G;p.H1267R                |
| chr10        | 114920414 | G   | A       | 50.4      | SNP  | ---         | TCF7L2  | NM_001146274:exon13:c.1355G>A;p.G452E              |
| chr16        | 2124279   | A   | T       | 20.1      | SNP  | ---         | TSC2    | NM_000548:exon22:c.2434A>T;p.S812C                 |
| chr17        | 7579389   | G   | A       | 100       | SNP  | ---         | TP53    | NM_000546:exon4:c.298C>T;p.Q100X                   |
| chr18        | 48593504  | G   | T       | 100       | SNP  | ---         | SMAD4   | NM_005359:exon10:c.1255G>T;p.G419W                 |
| <b>HC21T</b> |           |     |         |           |      |             |         |                                                    |
| chr4         | 153251894 | T   | C       | 52.6      | SNP  | ---         | FBXW7   | NM_018315:exon6:c.872A>G;p.K291R                   |
| chr5         | 112175068 | A   | -       | 72.3      | DEL  | ---         | APC     | NM_000038:exon16:c.3777_3778del;p.L1259fs          |
| chr7         | 138252340 | C   | A       | 24.8      | SNP  | ---         | TRIM24  | NM_003852:exon10:c.1543C>A;p.Q515K                 |
| chr8         | 113317138 | G   | T       | 20        | SNP  | ---         | CSMD3   | NM_198123:exon52:c.8078C>A;p.T2693K                |



Table S1. Cont.

|               |           |               |         |      |     |            |  |                 |                                                  |
|---------------|-----------|---------------|---------|------|-----|------------|--|-----------------|--------------------------------------------------|
| chr9          | 135787745 | G             | C       | 55.5 | SNP | ---        |  | <i>TSC1</i>     | NM_000368:exon9:c.837C>G;p.H279Q                 |
| chr10         | 76735968  | T             | G       | 37.6 | SNP | ---        |  | <i>KAT6B</i>    | NM_012330:exon8:c.1873T>G;p.F625V                |
| chr11         | 71715775  | T             | C       | 53.2 | SNP | ---        |  | <i>NUMA1</i>    | NM_006185:exon24:c.5917A>G;p.I1973V              |
| chr17         | 7578275   | G             | A       | 99   | SNP | COSM10733  |  | <i>TP53</i>     | NM_000546:exon6:c.574C>T;p.Q192X                 |
| <b>HC22T</b>  |           |               |         |      |     |            |  |                 |                                                  |
| chr4          | 106156877 | A             | T       | 96.4 | SNP | ---        |  | <i>TET2</i>     | NM_017628:exon3:c.1778A>T;p.Q593L                |
| chr5          | 112162870 | CACTACAGTATTA | -       | 100  | DEL | ---        |  | <i>APC</i>      | NM_000038:exon12:c.1474_1486del;p.H492fs         |
| chr7          | 91603046  | A             | G       | 20.9 | SNP | ---        |  | <i>AKAP9</i>    | NM_005751:exon2:c.70A>G;p.K24E                   |
| chr17         | 7577548   | C             | T       | 100  | SNP | COSM6932   |  | <i>TP53</i>     | NM_000546:exon7:c.733G>A;p.G245S                 |
| chr18         | 50848557  | T             | G       | 35.4 | SNP | ---        |  | <i>DCC</i>      | NM_005215:exon17:c.2525C>A;p.T842N               |
| chr22         | 41553373  | C             | G       | 27.5 | SNP | ---        |  | <i>EP300</i>    | NM_001429:exon18:c.3462C>G;p.D1154E              |
| <b>HC28T</b>  |           |               |         |      |     |            |  |                 |                                                  |
| chr3          | 71026184  | C             | A       | 51.4 | SNP | ---        |  | <i>FOXP1</i>    | NM_032682:exon17:c.1438G>T;p.E480X               |
| chr3          | 178936082 | G             | A       | 52.2 | SNP | COSM760    |  | <i>PIK3CA</i>   | NM_006218:exon10:c.1624G>A;p.E542K               |
| chr5          | 112151261 | C             | T       | 100  | SNP | COSM13862  |  | <i>APC</i>      | NM_000038:exon9:c.904C>T;p.R302X                 |
| chr22         | 24176338  | C             | T       | 54   | SNP | ---        |  | <i>SMARCB1</i>  | NM_003073:exon9:c.1129C>T;p.R377C                |
| <b>HC40T</b>  |           |               |         |      |     |            |  |                 |                                                  |
| chr3          | 178936091 | G             | A       | 67.8 | SNP | COSM125370 |  | <i>PIK3CA</i>   | NM_006218:exon10:c.1633G>A;p.E545K               |
| chr5          | 112103086 | AG            | -       | 36.6 | DEL | COSM25153  |  | <i>APC</i>      | NM_000038:exon4:c.417_418del;p.K139fs            |
| chr5          | 112176398 | G             | A       | 60   | SNP | ---        |  | <i>APC</i>      | NM_000038:exon16:c.5107G>A;p.G1703R              |
| chr5          | 176618907 | C             | T       | 65.6 | SNP | ---        |  | <i>NSD1</i>     | NM_022455:exon3:c.950C>T;p.T317M                 |
| chr7          | 55211097  | G             | A       | 42.5 | SNP | ---        |  | <i>EGFR</i>     | NM_005228:exon3:c.340G>A;p.E114K                 |
| chr10         | 70332760  | G             | T       | 48.4 | SNP | ---        |  | <i>TET1</i>     | NM_030625:exon2:c.665G>T;p.R222L                 |
| chr10         | 90767542  | A             | C       | 50.2 | SNP | ---        |  | <i>FAS</i>      | NM_000043:exon3:c.282A>C;p.K94N                  |
| chr13         | 28964142  | A             | T       | 31.7 | SNP | ---        |  | <i>FLT1</i>     | NM_002019:exon13:c.1760T>A;p.V587D               |
| chr16         | 2127724   | G             | A       | 44.5 | SNP | ---        |  | <i>TSC2</i>     | NM_000548:exon26:c.2963G>A;p.R988H               |
| chr16         | 27460579  | C             | G       | 28.3 | SNP | ---        |  | <i>IL21R</i>    | NM_021798:exon9:c.1592C>G;p.S531W                |
| chr17         | 7578406   | C             | T       | 100  | SNP | COSM99914  |  | <i>TP53</i>     | NM_000546:exon5:c.524G>A;p.R175H                 |
| chrX          | 41029432  | A             | C       | 45.8 | SNP | ---        |  | <i>USP9X</i>    | NM_001039590:exon19:c.2821A>C;p.I941L            |
| <b>HC67T</b>  |           |               |         |      |     |            |  |                 |                                                  |
| chr5          | 38481794  | C             | T       | 76.2 | SNP | ---        |  | <i>LIFR</i>     | NM_002310:exon20:c.3197G>A;p.R1066Q              |
| chr5          | 112175958 | -             | A       | 100  | INS | COSM18561  |  | <i>APC</i>      | NM_000038:exon16:c.4662dupA;p.E1554fs            |
| chr6          | 51524309  | T             | C       | 31   | SNP | ---        |  | <i>PKHD1</i>    | NM_138694:exon61:c.10615A>G;p.M3539V             |
| chr6          | 152599456 | C             | T       | 65.6 | SNP | ---        |  | <i>SYNE1</i>    | NM_033071:exon45:c.6726A>C;p.E2242D              |
| chr10         | 88649927  | T             | A       | 95.6 | SNP | ---        |  | <i>BMPR1A</i>   | NM_004329:exon4:c.176T>A;p.L59X                  |
| chr17         | 78360208  | A             | G       | 100  | SNP | ---        |  | <i>RNF213</i>   | NM_001256071:exon62:c.14698A>G;p.K4900E          |
| <b>HC73T</b>  |           |               |         |      |     |            |  |                 |                                                  |
| chr5          | 112162891 | C             | T       | 57.8 | SNP | COSM29364  |  | <i>APC</i>      | NM_000038:exon12:c.1495C>T;p.R499X               |
| chr5          | 112175510 | AG            | -       | 47.2 | DEL | COSM19088  |  | <i>APC</i>      | NM_000038:exon16:c.4217_4218del;p.Q1406fs        |
| chr8          | 113564823 | C             | T       | 99.3 | SNP | ---        |  | <i>CSMD3</i>    | NM_052900:exon40:c.6069delT;p.F2023fs            |
| chr13         | 110436398 | C             | G       | 68.7 | SNP | ---        |  | <i>IRS2</i>     | NM_003749:exon1:c.2003G>C;p.G668A                |
| chr17         | 7578190   | T             | C       | 100  | SNP | COSM99720  |  | <i>TP53</i>     | NM_000546:exon6:c.659A>G;p.Y220C                 |
| chr17         | 37881392  | A             | T       | 48.9 | SNP | ---        |  | <i>ERBB2</i>    | NM_004448:exon21:c.2584A>T;p.T862S               |
| <b>HC74T</b>  |           |               |         |      |     |            |  |                 |                                                  |
| chr2          | 30143052  | G             | -       | 48.2 | DEL | ---        |  | <i>ALK</i>      | NM_004304:exon1:c.475G>A;p.G159R                 |
| chr5          | 112116592 | C             | T       | 51.3 | SNP | COSM13134  |  | <i>APC</i>      | NM_000038:exon16:c.4185delT;p.S1395fs            |
| chr5          | 112175476 | T             | -       | 50.2 | DEL | ---        |  | <i>APC</i>      | NM_000038:exon6:c.637C>T;p.R213X                 |
| chr7          | 92733555  | A             | C       | 30.3 | SNP | ---        |  | <i>SAMD9</i>    | NM_017654:exon3:c.1856T>G;p.L619R                |
| chr13         | 113975779 | G             | A       | 48.3 | SNP | ---        |  | <i>LAMP1</i>    | NM_005561:exon7:c.937G>A;p.A313T                 |
| chr17         | 7577105   | G             | A       | 97.7 | SNP | COSM10863  |  | <i>TP53</i>     | NM_000546:exon8:c.833C>T;p.P278L                 |
| chr17         | 48263150  | C             | T       | 53.6 | SNP | ---        |  | <i>COL1A1</i>   | NM_000088:exon50:c.4237G>A;p.D1413N              |
| <b>HC80T</b>  |           |               |         |      |     |            |  |                 |                                                  |
| chr1          | 27106006  | C             | -       | 60   | DEL | ---        |  | <i>ARID1A</i>   | NM_006015:exon20:c.5617delC;p.P1873fs            |
| chr5          | 112102946 | G             | A       | 36.9 | SNP | ---        |  | <i>APC</i>      | NM_000038:exon4:c.281G>A;p.R94H                  |
| chr5          | 112128143 | C             | T       | 99.2 | SNP | COSM98420  |  | <i>APC</i>      | NM_000038:exon7:c.646C>T;p.R216X                 |
| chr7          | 142568063 | C             | T       | 27.9 | SNP | ---        |  | <i>EPHB6</i>    | NM_004445:exon15:c.2704C>T;p.R902C               |
| chr12         | 43925980  | G             | A       | 47   | SNP | ---        |  | <i>ADAMTS20</i> | NM_025003:exon3:c.472C>T;p.Q158X                 |
| chr12         | 56482415  | G             | C       | 27.6 | SNP | ---        |  | <i>ERBB3</i>    | NM_001982:exon8:c.963G>C;p.E321D                 |
| chr17         | 7577124   | C             | T       | 100  | SNP | COSM10891  |  | <i>TP53</i>     | NM_000546:exon8:c.814G>A;p.V272M                 |
| <b>HC93T</b>  |           |               |         |      |     |            |  |                 |                                                  |
| chr1          | 27088705  | T             | -       | 25   | DEL | ---        |  | <i>ARID1A</i>   | NM_006015:exon7:c.2314delT;p.S772fs              |
| chr3          | 52713613  | AA            | -       | 59.5 | DEL | ---        |  | <i>PBRM1</i>    | NM_018313:exon2:c.114_115del;p.L38fs             |
| chr6          | 152642901 | T             | C       | 63.6 | SNP | ---        |  | <i>SYNE1</i>    | NM_033071:exon54:c.8395C>T;p.R2799C              |
| chr17         | 7578406   | C             | T       | 100  | SNP | COSM10648  |  | <i>TP53</i>     | NM_000546:exon5:c.524G>A;p.R175H                 |
| <b>HC108T</b> |           |               |         |      |     |            |  |                 |                                                  |
| chr2          | 141356273 | G             | T       | 45.5 | SNP | ---        |  | <i>LRP1B</i>    | NM_018557:exon43:c.7121C>A;p.A2374E              |
| chr3          | 142241655 | T             | C       | 69.6 | SNP | ---        |  | <i>ATR</i>      | NM_001184:exon23:c.4181A>G;p.Y1394C              |
| chr5          | 112162891 | C             | T       | 67.7 | SNP | COSM29364  |  | <i>APC</i>      | NM_000038:exon12:c.1495C>T;p.R499X               |
| chr5          | 112175482 | -             | GAGTCGT | 32.2 | INS | ---        |  | <i>APC</i>      | NM_000038:exon16:c.4190_4191insGAGTCGT;p.E1397fs |
| chr17         | 7578406   | C             | T       | 100  | SNP | COSM10648  |  | <i>TP53</i>     | NM_000546:exon5:c.524G>A;p.R175H                 |
| <b>HC117T</b> |           |               |         |      |     |            |  |                 |                                                  |
| chr5          | 112164586 | C             | T       | 40.4 | SNP | COSM19040  |  | <i>APC</i>      | NM_000038:exon14:c.1660C>T;p.R554X               |
| chr5          | 112175136 | C             | G       | 44.6 | SNP | ---        |  | <i>APC</i>      | NM_000038:exon16:c.3845C>G;p.S1282X              |
| chr6          | 31133815  | T             | C       | 46.5 | SNP | ---        |  | <i>POU5F1</i>   | NM_002701:exon2:c.415A>G;p.I139V                 |
| chr8          | 42176918  | G             | A       | 23.1 | SNP | ---        |  | <i>IKBK</i>     | NM_001556:exon14:c.1495G>A;p.E499K               |

Table S1. Cont.

|               |                 |   |          |           |  |                 |                                              |
|---------------|-----------------|---|----------|-----------|--|-----------------|----------------------------------------------|
| chr11         | 44129720 T      | C | 53.2 SNP | ---       |  | <i>EXT2</i>     | NM_000401:exon2:c.557T>C;p.F186S             |
| chr17         | 7577121 G       | A | 97.6 SNP | COSM10659 |  | <i>TP53</i>     | NM_000546:exon8:c.817C>T;p.R273C             |
| <b>HC120T</b> |                 |   |          |           |  |                 |                                              |
| chr1          | 186301460 C     | G | 100 SNP  | ---       |  | <i>TPR</i>      | NM_003292:exon38:c.5471G>C;p.S1824T          |
| chr2          | 29606678 C      | T | 25.1 SNP | ---       |  | <i>ALK</i>      | NM_004304:exon5:c.1202G>A;p.R401Q            |
| chr7          | 50467988 G      | A | 45.8 SNP | ---       |  | <i>IKZF1</i>    | NM_006060:exon8:c.1223G>A;p.R408H            |
| chr17         | 7578189 -       | A | 100 INS  | ---       |  | <i>TP53</i>     | NM_000546:exon6:c.660dupT;p.E221_P222delinsX |
| chr18         | 22804908 T      | A | 100 SNP  | ---       |  | <i>ZNF521</i>   | NM_015461:exon4:c.2974A>T;p.I992F            |
| <b>HC129T</b> |                 |   |          |           |  |                 |                                              |
| chr2          | 100627984 G     | A | 22.7 SNP | ---       |  | <i>AFF3</i>     | NM_001025108:exon3:c.103C>T;p.Q35X           |
| chr5          | 112175217 AAAAG | - | 100 DEL  | COSM18701 |  | <i>APC</i>      | NM_000038:exon16:c.3921_3925del;p.I1307fs    |
| chr8          | 38271150 C      | T | 30.7 SNP | ---       |  | <i>FGFR1</i>    | NM_015850:exon18:c.2459G>A;p.R820H           |
| chr14         | 102551042 G     | C | 26.5 SNP | ---       |  | <i>HSP90AA1</i> | NM_005348:exon5:c.957C>G;p.D319E             |
| chr15         | 40915657 A      | - | 24.3 DEL | ---       |  | <i>CASC5</i>    | NM_144508:exon10:c.3195delA;p.R1065fs        |
| chr17         | 7578406 C       | T | 100 SNP  | COSM99022 |  | <i>TP53</i>     | NM_000546:exon5:c.524G>A;p.R175H             |
| <b>HC142T</b> |                 |   |          |           |  |                 |                                              |
| chr1          | 204403666 C     | T | 41.2 SNP | ---       |  | <i>PIK3C2B</i>  | NM_002646:exon25:c.3587G>A;p.R1196Q          |
| chr4          | 62801716 G      | A | 46.1 SNP | ---       |  | <i>LPHN3</i>    | NM_015236:exon14:c.2168G>A;p.S723N           |
| chr6          | 44219235 AA     | - | 50 DEL   | ---       |  | <i>HSP90AB1</i> | NM_007355:exon8:c.1204_1205del;p.K402fs      |
| chr6          | 152485403 G     | T | 43.7 SNP | ---       |  | <i>SYNE1</i>    | NM_033071:exon130:c.23472C>A;p.S7824R        |
| chr9          | 37002728 G      | A | 32.3 SNP | ---       |  | <i>PAX5</i>     | NM_016734:exon5:c.521C>T;p.S174L             |
| chr11         | 108188143 T     | G | 86.7 SNP | ---       |  | <i>ATM</i>      | NM_000051:exon43:c.6242T>G;p.L2081X          |
| <b>HC146T</b> |                 |   |          |           |  |                 |                                              |
| chr1          | 27105520 G      | - | 47.5 DEL | ---       |  | <i>ARID1A</i>   | NM_006015:exon20:c.5131delG;p.G1711fs        |
| chr1          | 186645619 G     | A | 46.4 SNP | ---       |  | <i>PTGS2</i>    | NM_000963:exon7:c.950C>T;p.T317I             |
| chr7          | 13971180 A      | G | 48.7 SNP | ---       |  | <i>ETV1</i>     | NM_004956:exon9:c.749T>C;p.F250S             |
| chr17         | 7578555 C       | T | 100 SNP  | ---       |  | <i>TP53</i>     | Splicing                                     |

**Table S2.** List of 409 cancer-related genes investigated in the present study.

|          |         |         |          |        |         |         |          |        |
|----------|---------|---------|----------|--------|---------|---------|----------|--------|
| ABL1     | CBL     | EP300   | GATA2    | LAMP1  | MYD88   | PKHD1   | SMARCA4  | WHSC1  |
| ABL2     | CCND1   | EP400   | GATA3    | LCK    | MYH11   | PLAG1   | SMARCB1  | WRN    |
| ACVR2A   | CCND2   | EPHA3   | GDNF     | LIFR   | MYH9    | PLCG1   | SMO      | WT1    |
| ADAMTS20 | CCNE1   | EPHA7   | GNA11    | LPHN3  | NBN     | PLEKHG5 | SMUG1    | XPA    |
| AFF1     | CD79A   | EPHB1   | GNAQ     | POT1   | NCOA1   | PML     | SOC3     | XPC    |
| AFF3     | CD79B   | EPHB4   | GNAS     | LPP    | NCOA2   | PMS1    | SOX11    | XPO1   |
| AKAP9    | CDC73   | EPHB6   | GPR124   | LRP1B  | NCOA4   | PMS2    | SOX2     | XRCC2  |
| AKT1     | CDH1    | ERBB2   | GRM8     | LTF    | NF1     | POU5F1  | SRC      | ZNF384 |
| AKT2     | CDH11   | ERBB3   | GUCY1A2  | LTK    | NF2     | PPARG   | SSX1     | ZNF521 |
| AKT3     | CDH2    | ERBB4   | HCAR1    | MAF    | NFE2L2  | PPP2R1A | STK11    |        |
| ALK      | CDH20   | ERCC1   | HIF1A    | MAFB   | NFKB1   | PRDM1   | STK36    |        |
| APC      | CDH5    | ERCC2   | HLF      | MAGEA1 | NFKB2   | PRKAR1A | SUFU     |        |
| AR       | CDK12   | ERCC3   | HNF1A    | MAG1   | NIN     | PRKDC   | SYK      |        |
| ARID1A   | CDK4    | ERCC4   | HOOK3    | MALT1  | NKX2-1  | PSIP1   | SYNE1    |        |
| ARID2    | CDK6    | ERCC5   | HRAS     | MAML2  | NLRP1   | PTCH1   | TAF1     |        |
| ARNT     | CDK8    | ERG     | HSP90AA1 | MAP2K1 | NOTCH1  | PTEN    | TAF1L    |        |
| ASXL1    | CDKN2A  | ESR1    | HSP90AB1 | MAP2K2 | NOTCH2  | PTGS2   | TAL1     |        |
| ATF1     | CDKN2B  | ETS1    | ICK      | MAP2K4 | NOTCH4  | PTPN11  | TBX22    |        |
| ATM      | CDKN2C  | ETV1    | IDH1     | MAP3K7 | NPM1    | PTPRD   | TCF12    |        |
| ATR      | CEBPA   | ETV4    | IDH2     | MAPK1  | NRAS    | PTPRT   | TCF3     |        |
| ATRX     | CHEK1   | EXT1    | IGF1R    | MAPK8  | NSD1    | RAD50   | TCF7L1   |        |
| AURKA    | CHEK2   | EXT2    | IGF2     | MARK1  | NTRK1   | RAF1    | TCF7L2   |        |
| AURKB    | CIC     | EZH2    | IGF2R    | MARK4  | NTRK3   | RALGDS  | TCL1A    |        |
| AURKC    | CKS1B   | FAM123B | IKBK     | MBD1   | NUMA1   | RARA    | TET1     |        |
| AXL      | CMPK1   | FANCA   | IKBKE    | MCL1   | NUP214  | RB1     | TET2     |        |
| BAI3     | COL1A1  | FANCC   | IKZF1    | MDM2   | NUP98   | RECQL4  | TFE3     |        |
| BAP1     | CRBN    | FANCD2  | IL2      | MDM4   | PAK3    | REL     | TGFBF2   |        |
| BCL10    | CREB1   | FANCF   | IL21R    | MEN1   | PALB2   | RET     | TGM7     |        |
| BCL11A   | CREBBP  | FANCG   | IL6ST    | MET    | PARP1   | RHOH    | THBS1    |        |
| BCL11B   | CRKL    | FAS     | IL7R     | MITF   | PAX3    | RNASEL  | TIMP3    |        |
| BCL2     | CRTC1   | FBXW7   | ING4     | MLH1   | PAX5    | RNF2    | TLR4     |        |
| BCL2L1   | CSF1R   | FGFR1   | IRF4     | MLL    | PAX7    | RNF213  | TLX1     |        |
| BCL2L2   | CSMD3   | FGFR2   | IRS2     | MLL2   | PAX8    | ROS1    | TNFAIP3  |        |
| BCL3     | CTNNA1  | FGFR3   | ITGA10   | MLL3   | PBRM1   | RPS6KA2 | TNFRSF14 |        |
| BCL6     | CTNNB1  | FGFR4   | ITGA9    | MLLT10 | PBX1    | RRM1    | TNK2     |        |
| BCL9     | CYLD    | FH      | ITGB2    | MMP2   | PDE4DIP | RUNX1   | TOP1     |        |
| BCR      | CYP2C19 | FLCN    | ITGB3    | MN1    | PDGFB   | RUNX1T1 | TP53     |        |
| BIRC2    | CYP2D6  | FLI1    | JAK1     | MPL    | PDGFRA  | SAMD9   | TPR      |        |
| BIRC3    | DAXX    | FLT1    | JAK2     | MRE11A | PDGFRB  | SBDS    | TRIM24   |        |
| BIRC5    | DCC     | FLT3    | JAK3     | MSH2   | PER1    | SDHA    | TRIM33   |        |
| BLM      | DDB2    | FLT4    | JUN      | MSH6   | PGAP3   | SDHB    | TRIP11   |        |
| BLNK     | DDIT3   | FN1     | KAT6A    | MTOR   | PHOX2B  | SDHC    | TRRAP    |        |
| BMPR1A   | DDR2    | FOXL2   | KAT6B    | MTR    | PIK3C2B | SDHD    | TSC1     |        |
| BRAF     | DEK     | FOXO1   | KDM5C    | MTRR   | PIK3CA  | SEPT9   | TSC2     |        |
| BRD3     | DICER1  | FOXO3   | KDM6A    | MUC1   | PIK3CB  | SETD2   | TSHR     |        |
| BRIP1    | DNMT3A  | FOXP1   | KDR      | MUTYH  | PIK3CD  | SF3B1   | UBR5     |        |
| BTK      | DPYD    | FOXP4   | KEAP1    | MYB    | PIK3CG  | SGK1    | UGT1A1   |        |
| BUB1B    | DST     | FZR1    | KIT      | MYC    | PIK3R1  | SH2D1A  | USP9X    |        |
| CARD11   | EGFR    | G6PD    | KLF6     | MYCL1  | PIK3R2  | SMAD2   | VHL      |        |
| CASC5    | EML4    | GATA1   | KRAS     | MYCN   | PIM1    | SMAD4   | WAS      |        |

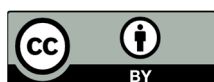

Supplement: cancers-12-02010-s001.pdf [file cancers-12-02010-s001.pdf]
